# Supplementary figures and images for: A long non-coding RNA targets microRNA miR-34a to regulate colon cancer stem cell asymmetric division
Source: eLife journal article supplement (doi:10.7554/elife.14620), 2016-04-14

Figure 2-figure supplement 3

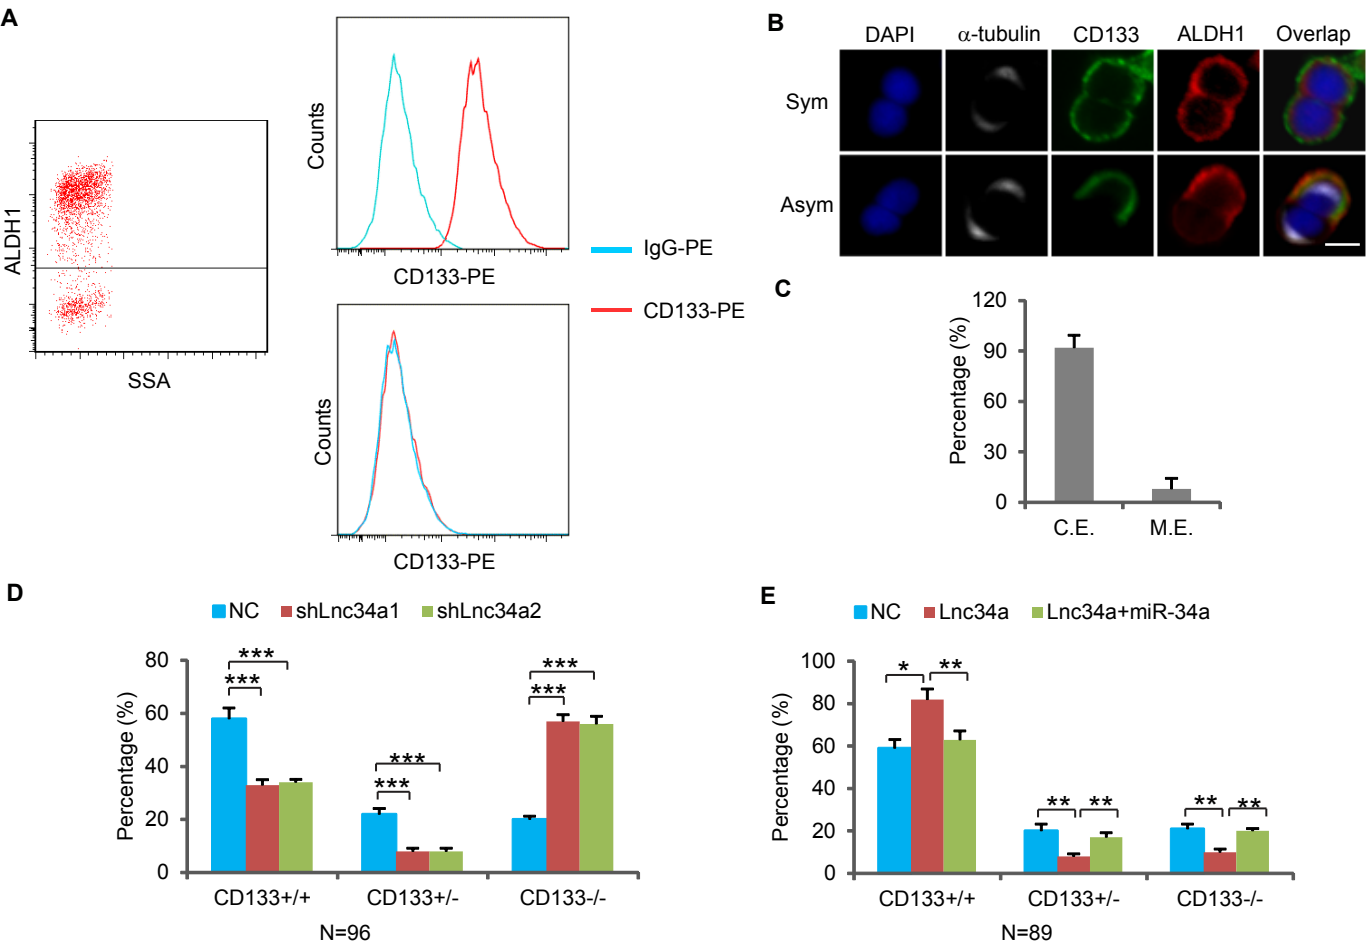

Supplement: supp [file elife-14620-supp-v1.zip]

Figure 4-figure supplement 4

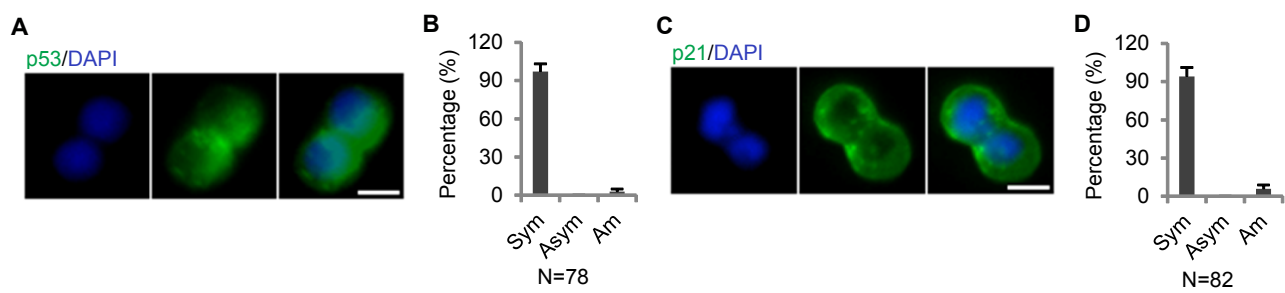

Supplement: supp [file elife-14620-supp-v1.zip]

Figure 1-figure supplement 1

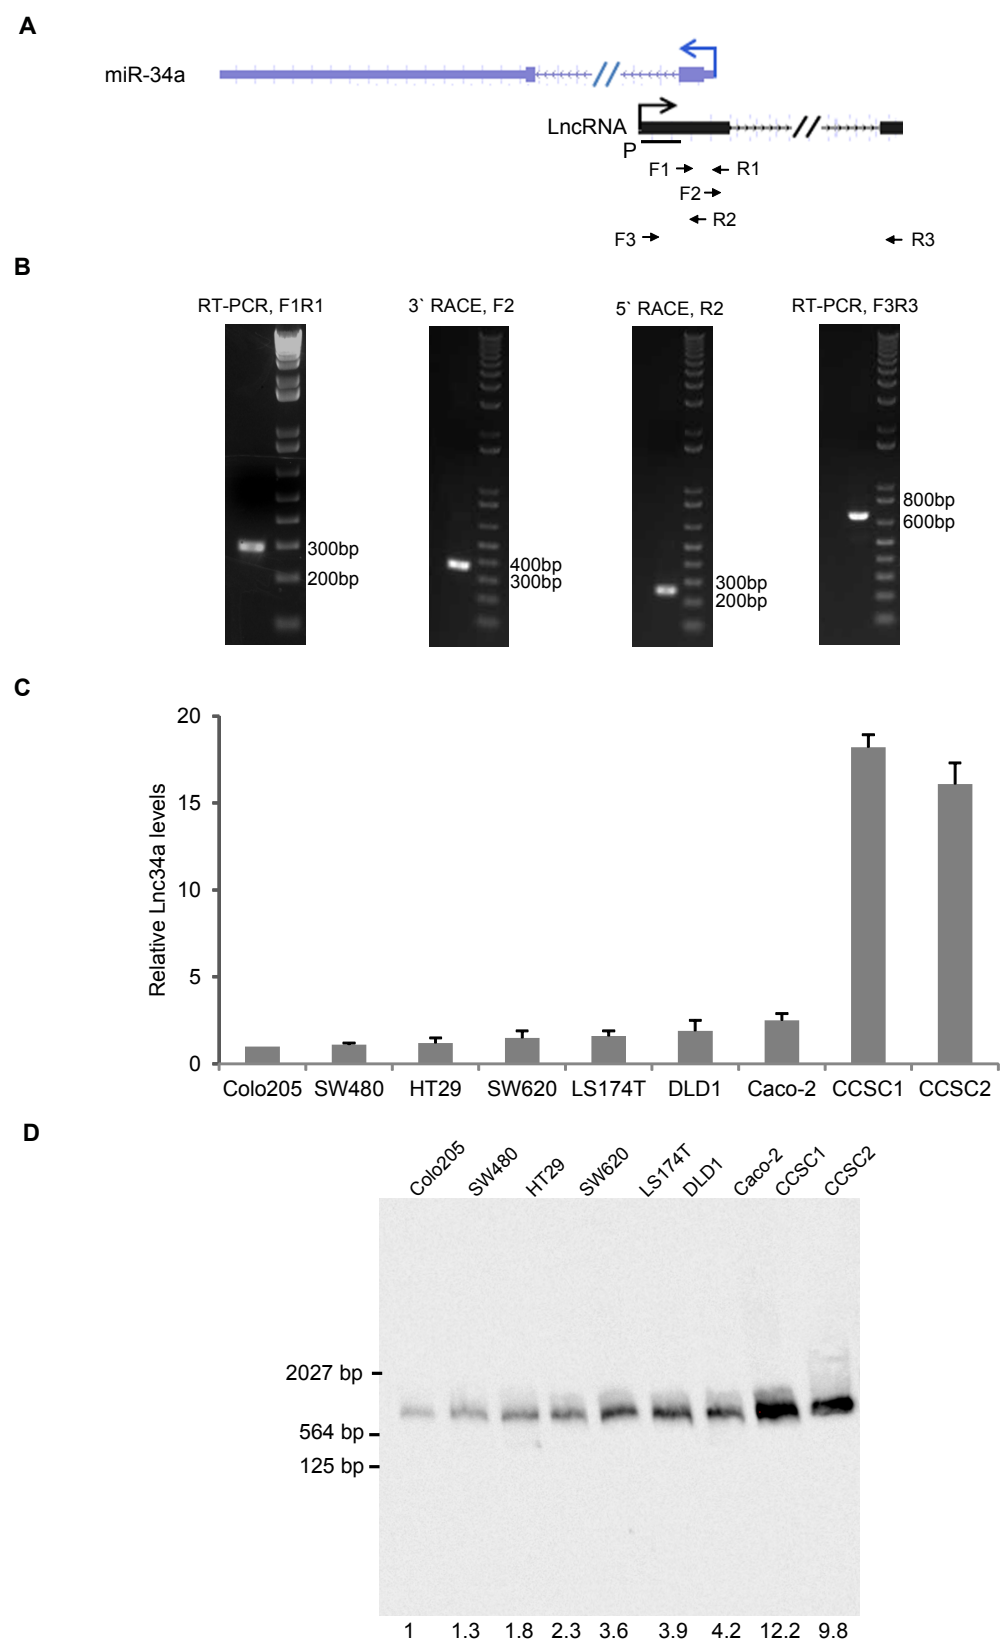

Supplement: supp [file elife-14620-supp-v1.zip]

Figure 4-figure supplement 6

A

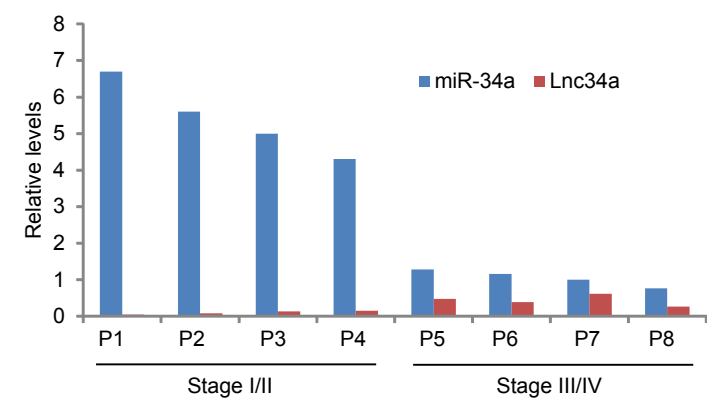

B

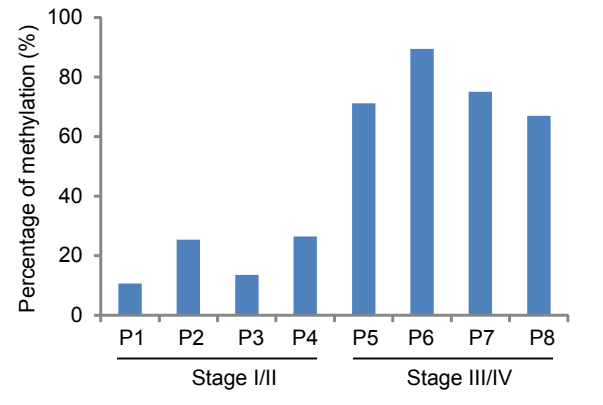

Supplement: supp [file elife-14620-supp-v1.zip]

Figure 1-figure supplement 2

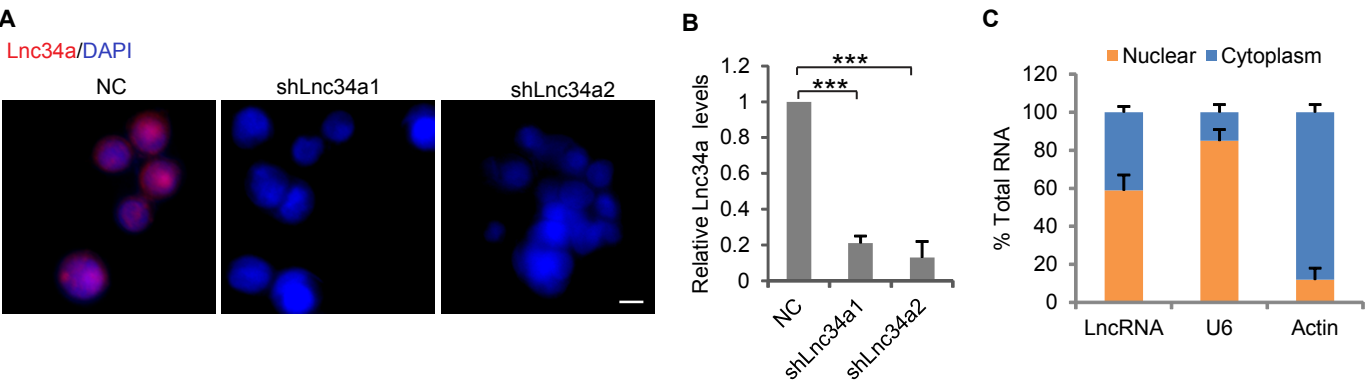

Supplement: supp [file elife-14620-supp-v1.zip]

Figure 4-figure supplement 5

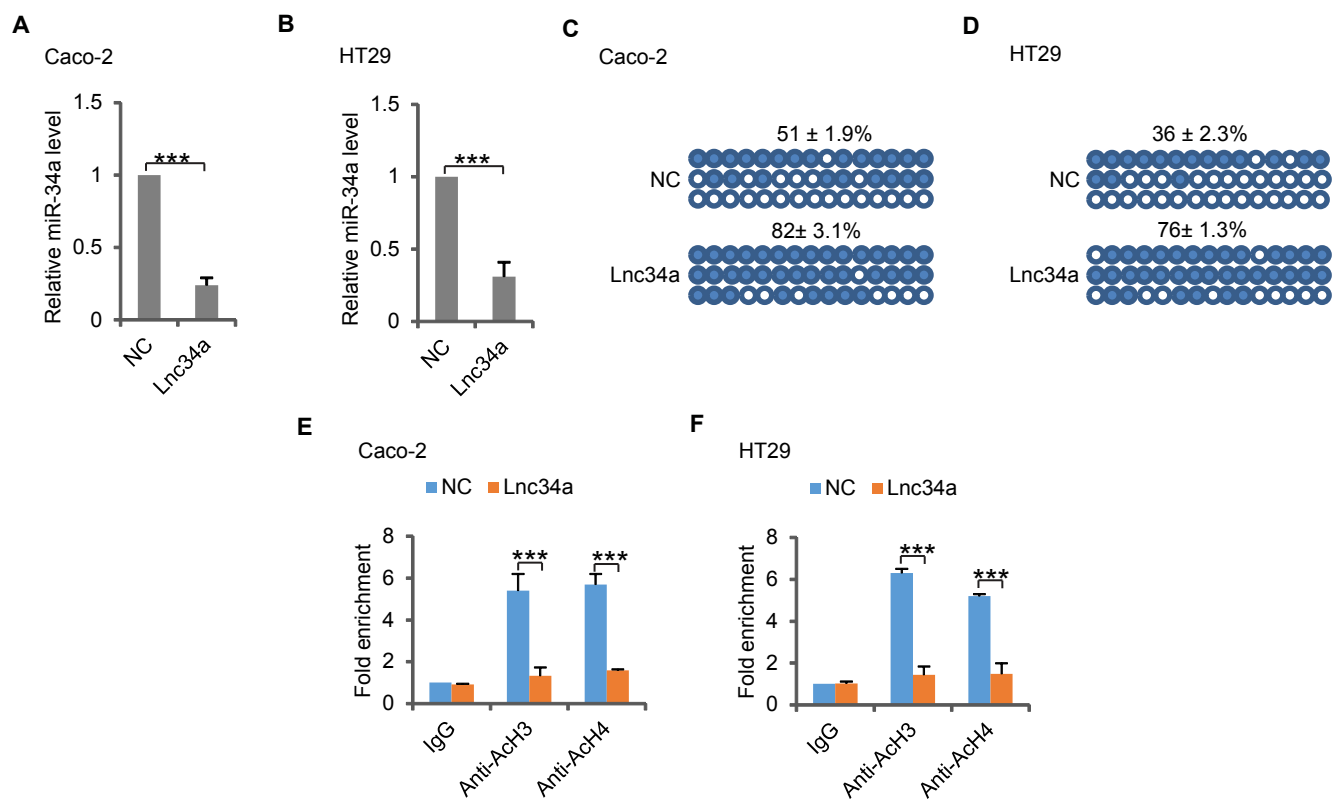

Supplement: supp [file elife-14620-supp-v1.zip]
